# Supplementary material for: Impact of dementia on informal care: a systematic review of family caregivers’ perceptions
Source: HighWire-hosted journal article supplement (doi:10.1136/bmjspcare-2020-002242), 2020-10-14
Supplement: bmjspcare-2020-002242supp001_data_supplement.pdf [file bmjspcare-2020-002242supp001_data_supplement.pdf]

**Supplementary material**

*Table 1. Quality Assessment of 81 Studies Included in this Systematic Review*

*Table 2. Characteristics and key findings of the included studies in this systematic review (n=81)*

*Table 3. Summary of methods and participants of 81 studies included in this systematic review*

*Additional file 1 | Search strategy*

*Additional file 2 | PRISMA Checklist*

Table 1. Quality Assessment of 81 Studies Included in this Systematic Review

| Studies                           | Clear statement of study aims | Qualitative methodology appropriate | Study design appropriate to address the study aim                                             | Recruitment appropriate | Data collection                                                                                                                                       | Relationship between research and participants | Ethical issues considered                                                  | Data analysis                                                                                    |
|-----------------------------------|-------------------------------|-------------------------------------|-----------------------------------------------------------------------------------------------|-------------------------|-------------------------------------------------------------------------------------------------------------------------------------------------------|------------------------------------------------|----------------------------------------------------------------------------|--------------------------------------------------------------------------------------------------|
| (Aminzadeh <i>et al.</i> , 2007)  | Yes                           | Yes                                 | Yes                                                                                           | Yes                     | 1. No discussion about saturation data                                                                                                                | No details                                     | Yes                                                                        | 1.No discussion on contradictory data 2.No discussion on researcher bias                         |
| Berry <i>et al.</i> , 2015)       | Yes                           | Yes                                 | Yes                                                                                           | yes                     | 1. No discussion about saturation data                                                                                                                | No details                                     | No information on ethical issues                                           | 1.No discussion on contradictory data 2.No in-depth description of the data analysis process     |
| (Boots LM <i>et al.</i> , 2015)   | Yes                           | Yes                                 | No discussion about why selecting the Grounded Theory Approach Modified                       | Yes                     | 1. No discussion on why selecting the interview approach                                                                                              | No details                                     | Yes, but no details about how researchers explained issues to participants | Yes                                                                                              |
| (Boughtwood <i>et al.</i> , 2011) | Yes                           | Yes                                 | No discussion about the study design                                                          | Yes                     | 1. No discussion on why selecting the focus group approach                                                                                            | No details                                     | Yes                                                                        | 1.No discussion on contradictory data 2.No in-depth description about how themes were identified |
| (Bunn <i>et al.</i> , 2017)       | Yes                           | Yes                                 | No discussion about the study design                                                          | Yes                     | 1. No in-depth information on interview schedule 2. No discussion about saturation data 3. No details about family caregivers relation to the patient | No details                                     | Yes                                                                        | 1.No discussion on contradictory data 2.No in-depth description about how themes were identified |
| (Butcher <i>et al.</i> , 2001)    | Yes                           | Yes                                 | Yes                                                                                           | Yes                     | 1. No in-depth information on interview schedule 2. No discussion about saturation data                                                               | No details                                     | Yes, but no details about how researchers explained issues to participants | 1.No discussion on contradictory data 2.No discussion on researcher bias                         |
| (Byszewski <i>et al.</i> , 2007)  | Yes                           | Yes                                 | Yes                                                                                           | Yes                     | 1. No discussion about saturation data 2. No details about family caregivers gender, relation to the patient or age                                   | No details                                     | Yes                                                                        | Yes                                                                                              |
| (Chang <i>et al.</i> , 2010)      | Yes                           | Yes                                 | No discussion about why selecting the Phenomenology Approach ( <i>described by Colaizzi</i> ) | Yes                     | 1. No in-depth information on interview schedule 2. No discussion about saturation data                                                               | No details                                     | Yes                                                                        | 1.No in-depth description about how themes were identified                                       |

| Studies                           | Clear statement of study aims | Qualitative methodology appropriate | Study design appropriate to address the study aim | Recruitment appropriate                                                                                                                | Data collection                                                                                                                                                           | Relationship between research and participants | Ethical issues considered                                                                                                  | Data analysis                                                                                                                         |
|-----------------------------------|-------------------------------|-------------------------------------|---------------------------------------------------|----------------------------------------------------------------------------------------------------------------------------------------|---------------------------------------------------------------------------------------------------------------------------------------------------------------------------|------------------------------------------------|----------------------------------------------------------------------------------------------------------------------------|---------------------------------------------------------------------------------------------------------------------------------------|
| (Connell <i>et al.</i> , 2004)    | Yes                           | Yes                                 | No discussion about the study design              | Yes                                                                                                                                    | 1. No discussion about saturation data 2. No details about care recipient gender or age                                                                                   | No details                                     | Yes, but no details about how researchers explained issues to participants                                                 | Yes                                                                                                                                   |
| (Duxury <i>et al.</i> , 2013)     | Yes                           | Yes                                 | No discussion about the study design              | 1. No discussion on why these participants were the most appropriate 2. No discussion on what participant selection criteria were used | 1. No discussion about saturation data 2. No details about caregiver gender, age or relation to patient 3. No details about care recipient gender or age                  | No details                                     | Yes                                                                                                                        | 1. No discussion on contradictory data 2.No discussion on researcher bias 3. No in-depth description about how themes were identified |
| (Elliott <i>et al.</i> , 2009)    | Yes                           | Yes                                 | Yes                                               | Yes                                                                                                                                    | 1. No discussion about saturation data 2. No details about family caregivers and care recipients age                                                                      | No details                                     | Yes                                                                                                                        | Yes                                                                                                                                   |
| (Fjellstrom <i>et al.</i> , 2010) | Yes                           | Yes                                 | Yes                                               | Yes                                                                                                                                    | 1. No in-depth information on interview schedule 2. No details about family caregivers relation to the care recipient 3. No details about care recipients age             | No details                                     | Yes                                                                                                                        | 1.No discussion on contradictory data 2. No in-depth description about how themes were identified                                     |
| (Fleming <i>et al.</i> , 2015)    | Yes                           | Yes                                 | Yes                                               | Yes                                                                                                                                    | 1. No discussion about saturation data 2. No details about family caregivers relation to the care recipient 3. No details about family caregivers and care recipients age | No details                                     | Yes                                                                                                                        | 1.No discussion on contradictory data 2. No in-depth description about how themes were identified                                     |
| (Forbes <i>et al.</i> , 2000)     | Yes                           | Yes                                 | Yes                                               | 1. No discussion on why these participants were the most appropriate                                                                   | 1. No discussion about saturation data                                                                                                                                    | No details                                     | Information on how researchers explained issues to participants No information about the signature of the informed consent | Yes                                                                                                                                   |
| (Forbes <i>et al.</i> , 2008)     | Yes                           | Yes                                 | No discussion about the study design              | Yes                                                                                                                                    | Yes                                                                                                                                                                       | No details                                     | Yes                                                                                                                        | 1.No discussion on contradictory data 2. No in-depth description about how themes were identified                                     |
| (Frank <i>et al.</i> , 2006)      | Yes                           | Yes                                 | No discussion about the study design              | Yes                                                                                                                                    | 1. No discussion about saturation data                                                                                                                                    | No details                                     | Yes                                                                                                                        | 1.No discussion on contradictory data 2. No in-depth description about how themes were identified                                     |

| Studies                               | Clear statement of study aims | Qualitative methodology appropriate | Study design appropriate to address the study aim | Recruitment appropriate                                                                                                                | Data collection                                                                                                                                                          | Relationship between research and participants | Ethical issues considered                                                  | Data analysis                                                                                                                        |
|---------------------------------------|-------------------------------|-------------------------------------|---------------------------------------------------|----------------------------------------------------------------------------------------------------------------------------------------|--------------------------------------------------------------------------------------------------------------------------------------------------------------------------|------------------------------------------------|----------------------------------------------------------------------------|--------------------------------------------------------------------------------------------------------------------------------------|
| (Garcia <i>et al.</i> , 2012), Canada | Yes                           | Yes                                 | No discussion about the study design              | Yes                                                                                                                                    | 1. No details about family caregivers relation to the care recipient 2. No details about family caregivers age                                                           | No details                                     | Yes                                                                        | 1. No discussion on the use of quotations to support the findings                                                                    |
| (Gennip <i>et al.</i> , 2014)         | Yes                           | Yes                                 | No discussion about the study design              | Yes                                                                                                                                    | 1. No discussion about saturation data 2. No details about family caregivers relation to the care recipient 3. No details about family caregivers age                    | No details                                     | Yes                                                                        | 1. No in-depth description about how themes were identified                                                                          |
| (Gessert <i>et al.</i> , 2001)        | Yes                           | Yes                                 | Yes                                               | 1. No discussion on what participant selection criteria were used                                                                      | 1. No discussion about saturation data 2. No details about family caregivers relation to the care recipient 3. No details about family caregivers and care recipient age | No details                                     | No information on ethical issues                                           | 1. No in-depth description about how themes were identified                                                                          |
| (Gessert <i>et al.</i> , 2006)        | Yes                           | Yes                                 | No discussion about the study design              | Yes                                                                                                                                    | 1. No discussion about saturation data                                                                                                                                   | No details                                     | No information on ethical issues                                           | 1. No in-depth description about how themes were identified                                                                          |
| (Givens <i>et al.</i> , 2012)         | Yes                           | Yes                                 | No discussion about the study design              | Yes                                                                                                                                    | 1. No discussion about saturation data 2. No details about family caregivers relation to the care recipient 3. No details about care recipient age                       | No details                                     | Yes, but no details about how researchers explained issues to participants | Yes                                                                                                                                  |
| (Glass, 2016)                         | Yes                           | Yes                                 | Yes                                               | 1. No discussion on why these participants were the most appropriate 2. No discussion on what participant selection criteria were used | Yes                                                                                                                                                                      | No details                                     | Yes, but no details about how researchers explained issues to participants | Yes                                                                                                                                  |
| (Habermann, <i>et al.</i> , 2013)     | Yes                           | Yes                                 | Yes                                               | Yes                                                                                                                                    | 1. No in-depth information on interview schedule 2. No discussion about saturation data                                                                                  | No details                                     | Yes, but no details about how researchers explained issues to participants | 1. No in-depth description about how themes were identified 2.No discussion on contradictory data 3.No discussion on researcher bias |
| (Harmer and Orrel, 2008)              | Yes                           | Yes                                 | Yes                                               | Yes                                                                                                                                    | 1. No discussion about saturation data                                                                                                                                   | No details                                     | Yes                                                                        | 1. No in-depth description about how themes were identified 2.No discussion on contradictory data 3.No discussion on researcher bias |

| Studies                                 | Clear statement of study aims | Qualitative methodology appropriate | Study design appropriate to address the study aim | Recruitment appropriate                                              | Data collection                                                                                                                                    | Relationship between research and participants | Ethical issues considered                                                  | Data analysis                                                                                                                        |
|-----------------------------------------|-------------------------------|-------------------------------------|---------------------------------------------------|----------------------------------------------------------------------|----------------------------------------------------------------------------------------------------------------------------------------------------|------------------------------------------------|----------------------------------------------------------------------------|--------------------------------------------------------------------------------------------------------------------------------------|
| (Harris, 2013)                          | Yes                           | Yes                                 | Yes                                               | Yes                                                                  | 1. No discussion about saturation data                                                                                                             | No details                                     | Yes                                                                        | 1. No in-depth description about how themes were identified 2.No discussion on contradictory data 3.No discussion on researcher bias |
| (Hemingway <i>et al.</i> , 2016)        | Yes                           | Yes                                 | Yes                                               | 1. No discussion on why these participants were the most appropriate | 1. No discussion about saturation data                                                                                                             | No details                                     | Yes                                                                        | 1. No in-depth description about how themes were identified 2.No discussion on contradictory data                                    |
| (Huis in het Veld <i>et al.</i> , 2016) | Yes                           | Yes                                 | No discussion about the study design              | Yes                                                                  | 1. No details about care recipient age                                                                                                             | No details                                     | Yes                                                                        | 1.No discussion on contradictory data                                                                                                |
| (Innes <i>et al.</i> , 2005)            | Yes                           | Yes                                 | No discussion about the study design              | Yes                                                                  | Yes                                                                                                                                                | No details                                     | Yes                                                                        | 1. No in-depth description about how themes were identified 2.No discussion on contradictory data 3.No discussion on researcher bias |
| (Innes <i>et al.</i> , 2011)            | Yes                           | Yes                                 | No discussion about the study design              | Yes                                                                  | 1. No discussion about saturation data 2. No details about family caregivers relation to the care recipient 3. No details about care recipient age | No details                                     | Yes                                                                        | Yes                                                                                                                                  |
| (Ivey <i>et al.</i> , 2012)             | Yes                           | Yes                                 | No discussion about the study design              | Yes                                                                  | 1. No discussion about saturation data No details about care recipient age                                                                         | No details                                     | Yes, but no details about how researchers explained issues to participants | Yes                                                                                                                                  |
| (Jamieson <i>et al.</i> , 2016)         | Yes                           | Yes                                 | No discussion about the study design              | 1. No discussion on why these participants were the most appropriate | 1. No discussion about saturation data 2. No details about family caregivers and care recipient age                                                | No details                                     | Yes                                                                        | 1. No in-depth description about how themes were identified 2.No discussion on contradictory data 3.No discussion on researcher bias |
| (Jennings <i>et al.</i> , 2017)         | Yes                           | Yes                                 | No discussion about the study design              | Yes                                                                  | 1. No discussion about saturation data                                                                                                             | No details                                     | Yes                                                                        | Yes                                                                                                                                  |
| (Juozapavicius and Weber, 2001)         | Yes                           | Yes                                 | No discussion about the study design              | Yes                                                                  | 1. No discussion about saturation data                                                                                                             | No details                                     | No information on ethical issues                                           | 1. No in-depth description about how themes were identified 2.No discussion on contradictory data 3.No discussion on researcher bias |

| Studies                               | Clear statement of study aims | Qualitative methodology appropriate | Study design appropriate to address the study aim | Recruitment appropriate                                           | Data collection                                                                                                                                                          | Relationship between research and participants | Ethical issues considered                                                  | Data analysis                                                                                                                        |
|---------------------------------------|-------------------------------|-------------------------------------|---------------------------------------------------|-------------------------------------------------------------------|--------------------------------------------------------------------------------------------------------------------------------------------------------------------------|------------------------------------------------|----------------------------------------------------------------------------|--------------------------------------------------------------------------------------------------------------------------------------|
| (Karlin <i>et al.</i> , 2001)         | Yes                           | Yes                                 | No discussion about the study design              | Yes                                                               | 1. No discussion about saturation data 2. No details about care recipient age                                                                                            | No details                                     | No information on ethical issues                                           | 1. No in-depth description about how themes were identified 2.No discussion on contradictory data 3.No discussion on researcher bias |
| (Karlsson <i>et al.</i> , 2014)       | Yes                           | Yes                                 | No discussion about the study design              | Yes                                                               | 1. No discussion about saturation data                                                                                                                                   | No details                                     | Yes, but no details about how researchers explained issues to participants | Yes                                                                                                                                  |
| (Kunneman <i>et al.</i> , 2017)       | Yes                           | Yes                                 | No discussion about the study design              | Yes                                                               | 1. No details about family caregivers relation to the care recipient                                                                                                     | No details                                     | Yes                                                                        | 1. No in-depth description about how themes were identified 2.No discussion on contradictory data                                    |
| (Lach and Chang, 2007)                | Yes                           | Yes                                 | Yes                                               | Yes                                                               | 1. No details about family caregivers age                                                                                                                                | No details                                     | Yes                                                                        | Yes                                                                                                                                  |
| (Lamahewa <i>et al.</i> , 2017)       | Yes                           | Yes                                 | Yes                                               | Yes                                                               | 1. No discussion about saturation data 2. No details about family caregivers relation to the care recipient 3. No details about family caregivers and care recipient age | No details                                     | Yes                                                                        | 1. No in-depth description about how themes were identified 2.No discussion on contradictory data                                    |
| (Lamech <i>et al.</i> , 2017)         | Yes                           | Yes                                 | Yes                                               | Yes                                                               | 1. No details about family caregivers relation to the care recipient 2. No details about care recipient age                                                              | No details                                     | Yes                                                                        | Yes                                                                                                                                  |
| (Lamech <i>et al.</i> , 2017)         | Yes                           | Yes                                 | Yes                                               | Yes                                                               | 1. No details about family caregivers relation to the care recipient 2. No details about care recipient age                                                              | No details                                     | Yes                                                                        | Yes                                                                                                                                  |
| (Lampley-Dallas <i>et al.</i> , 2001) | Yes                           | Yes                                 | Yes                                               | Yes                                                               | 1. No details about care recipient age                                                                                                                                   | No details                                     | Yes, but no details about how researchers explained issues to participants | 1. No in-depth description about how themes were identified                                                                          |
| (Lethin <i>et al.</i> , 2016)         | Yes                           | Yes                                 | Yes                                               | Yes                                                               | 1. No discussion about saturation data                                                                                                                                   | No details                                     | Yes, but no details about how researchers explained issues to participants | Yes                                                                                                                                  |
| (Levkoff and Hinton, 1999)            | Yes                           | Yes                                 | Yes                                               | 1. No discussion on what participant selection criteria were used | 1. No discussion about saturation data                                                                                                                                   | No details                                     | No information on ethical issues                                           | 1. No in-depth description about how themes were identified                                                                          |

| Studies                              | Clear statement of study aims | Qualitative methodology appropriate | Study design appropriate to address the study aim | Recruitment appropriate                                                                                                                | Data collection                                                                                                                                                          | Relationship between research and participants | Ethical issues considered | Data analysis                                                            |
|--------------------------------------|-------------------------------|-------------------------------------|---------------------------------------------------|----------------------------------------------------------------------------------------------------------------------------------------|--------------------------------------------------------------------------------------------------------------------------------------------------------------------------|------------------------------------------------|---------------------------|--------------------------------------------------------------------------|
| (Lian <i>et al.</i> , 2017)          | Yes                           | Yes                                 | Yes                                               | Yes                                                                                                                                    | 1. No discussion about saturation data                                                                                                                                   | No details                                     | Yes                       | Yes                                                                      |
| (Livingston <i>et al.</i> , 2010)    | Yes                           | Yes                                 | Yes                                               | Yes                                                                                                                                    | Yes                                                                                                                                                                      | No details                                     | Yes                       | 1. No in-depth description about how themes were identified              |
| (Madsen and Birkelund, 2013)         | Yes                           | Yes                                 | Yes                                               | 1. No discussion on why these participants were the most appropriate 2. No discussion on what participant selection criteria were used | 1. No in-depht information on interview schedule                                                                                                                         | No details                                     | Yes                       | Yes                                                                      |
| (Manthorpe <i>et al.</i> , 2013)     | Yes                           | Yes                                 | Yes                                               | Yes                                                                                                                                    | 1. No discussion about saturation data                                                                                                                                   | No details                                     | Yes                       | Yes                                                                      |
| (McCabe <i>et al.</i> , 2017)        | Yes                           | Yes                                 | Yes                                               | Yes                                                                                                                                    | 1. No discussion about saturation data 2. No details about family caregivers relation to the care recipient 3. No details about family caregivers and care recipient age | No details                                     | Yes                       | 1. No in-depth description about how themes were identified              |
| (Meyer, 2015)                        | Yes                           | Yes                                 | No discussion about the study design              | Yes                                                                                                                                    | 1. No discussion about saturation data 3. No in-depht information on interview schedule                                                                                  | No details                                     | Yes                       | 1. No in-depth description about how themes were identified              |
| (Milte <i>et al.</i> , 2016)         | Yes                           | Yes                                 | Yes                                               | Yes                                                                                                                                    | 1. No discussion about saturation data                                                                                                                                   | No details                                     | Yes                       | Yes                                                                      |
| (Moreno-Cámara <i>et al.</i> , 2016) | Yes                           | Yes                                 | Yes                                               | Yes                                                                                                                                    | 1. No details about care recipient age                                                                                                                                   | No details                                     | Yes                       | Yes                                                                      |
| (Morgan <i>et al.</i> , 2002)        | Yes                           | Yes                                 | Yes                                               | Yes                                                                                                                                    | 1. No discussion about saturation data 2. No in-depht information on interview schedule 3. No details about family caregivers and care recipient age                     | No details                                     | Yes                       | 1. No in-depth description about how themes were identified              |
| (Moyle <i>et al.</i> , 2002)         | Yes                           | Yes                                 | Yes                                               | Yes                                                                                                                                    | 1. No discussion about saturation data 2. No details about family caregivers and care recipient age or relation                                                          | No details                                     | Yes                       | 1.No discussion on contradictory data 2.No discussion on researcher bias |

| Studies                         | Clear statement of study aims | Qualitative methodology appropriate | Study design appropriate to address the study aim | Recruitment appropriate                                                                                                                | Data collection                                                                                       | Relationship between research and participants | Ethical issues considered | Data analysis                                                                                                                        |
|---------------------------------|-------------------------------|-------------------------------------|---------------------------------------------------|----------------------------------------------------------------------------------------------------------------------------------------|-------------------------------------------------------------------------------------------------------|------------------------------------------------|---------------------------|--------------------------------------------------------------------------------------------------------------------------------------|
| (Oliveira <i>et al.</i> , 2017) | Yes                           | Yes                                 | Yes                                               | Yes                                                                                                                                    | 1. No discussion about saturation data 2. No details about care recipient age                         | No details                                     | Yes                       | Yes                                                                                                                                  |
| (Paton <i>et al.</i> , 2004)    | Yes                           | Yes                                 | No discussion about the study design              | Yes                                                                                                                                    | 1. No discussion about saturation data 2. No details about care recipient age                         | None were family caregivers (all female)       | Yes                       | 1.No discussion on contradictory data 2.No discussion on researcher bias                                                             |
| (Peel and Harding, 2013)        | Yes                           | Yes                                 | Yes                                               | Yes                                                                                                                                    | 1. No discussion about saturation data                                                                | No details                                     | Yes                       | 1. No in-depth description about how themes were identified                                                                          |
| (Phillipson and Jones, 2011)    | Yes                           | Yes                                 | Yes                                               | 1. No discussion on why these participants were the most appropriate 2. No discussion on what participant selection criteria were used | 1. No discussion about saturation data                                                                | No details                                     | Yes                       | 1. No in-depth description about how themes were identified 2.No discussion on contradictory data 3.No discussion on researcher bias |
| (Polenick <i>et al.</i> , 2018) | Yes                           | Yes                                 | No discussion about the study design              | 1. No discussion on why these participants were the most appropriate                                                                   | 1. No discussion about saturation data                                                                | No details                                     | Yes                       | Yes                                                                                                                                  |
| (Polenick <i>et al.</i> , 2018) | Yes                           | Yes                                 | No discussion about the study design              | 1. No discussion on why these participants were the most appropriate                                                                   | 1. No discussion about saturation data                                                                | No details                                     | Yes                       | Yes                                                                                                                                  |
| (Poole <i>et al.</i> , 2018)    | Yes                           | Yes                                 | No discussion about the study design              | 1. No discussion on why these participants were the most appropriate                                                                   | 1. No discussion about saturation data 2. No details about familiar caregivers and care recipient age | No details                                     | Yes                       | Yes                                                                                                                                  |
| (Polenick <i>et al.</i> , 2018) | Yes                           | Yes                                 | No discussion about the study design              | 1. No discussion on why these participants were the most appropriate                                                                   | 1. No discussion about saturation data                                                                | No details                                     | Yes                       | Yes                                                                                                                                  |
| (Polenick <i>et al.</i> , 2018) | Yes                           | Yes                                 | No discussion about the study design              | 1. No discussion on why these participants were the most appropriate                                                                   | 1. No discussion about saturation data                                                                | No details                                     | Yes                       | Yes                                                                                                                                  |



| Studies                             | Clear statement of study aims | Qualitative methodology appropriate | Study design appropriate to address the study aim | Recruitment appropriate                                                                                                                | Data collection                                                                                               | Relationship between research and participants | Ethical issues considered                                                  | Data analysis                                                     |
|-------------------------------------|-------------------------------|-------------------------------------|---------------------------------------------------|----------------------------------------------------------------------------------------------------------------------------------------|---------------------------------------------------------------------------------------------------------------|------------------------------------------------|----------------------------------------------------------------------------|-------------------------------------------------------------------|
| (Poole <i>et al.</i> , 2018)        | Yes                           | Yes                                 | No discussion about the study design              | 1. No discussion on why these participants were the most appropriate                                                                   | 1. No discussion about saturation data 2. No details about familiar caregivers and care recipient age         | No details                                     | Yes                                                                        | Yes                                                               |
| (Popham and Orrell, 2012)           | Yes                           | Yes                                 | Yes                                               | 1. No discussion on why these participants were the most appropriate                                                                   | 1. No discussion about saturation data 2. No details about familiar caregivers age                            | No details                                     | Yes                                                                        | Yes                                                               |
| (Prorok <i>et al.</i> , 2016)       | Yes                           | Yes                                 | Yes                                               | Yes                                                                                                                                    | Yes                                                                                                           | No details                                     | Yes                                                                        | Yes                                                               |
| (Qazi <i>et al.</i> , 2010)         | Yes                           | Yes                                 | Yes                                               | 1. No discussion on what participant selection criteria were used                                                                      | 1. No discussion about saturation data                                                                        | No details                                     | Yes                                                                        | 1.No discussion on researcher bias                                |
| (Quinn <i>et al.</i> , 2014)        | Yes                           | Yes                                 | Yes                                               | 1. No discussion on why these participants were the most appropriate 2. No discussion on what participant selection criteria were used | 1. No discussion about saturation data                                                                        | No details                                     | Yes                                                                        | Yes                                                               |
| (Robinson <i>et al.</i> , 2008)     | Yes                           | Yes                                 | Yes                                               | 1. No discussion on why these participants were the most appropriate 2. No discussion on what participant selection criteria were used | 1. No discussion about saturation data 2. No details about familiar caregivers age or relation to the patient | No details                                     | Yes                                                                        | 1. No discussion on the use of quotations to support the findings |
| (Sarabia-Cobo <i>et al.</i> , 2016) | Yes                           | Yes                                 | Yes                                               | Yes                                                                                                                                    | 1. No discussion about saturation data                                                                        | No details                                     | Yes, but no details about how researchers explained issues to participants | Yes                                                               |
| (Scott <i>et al.</i> , 2016)        | Yes                           | Yes                                 | Yes                                               | Yes                                                                                                                                    | 1. No discussion about saturation data                                                                        | No details                                     | Yes                                                                        | Yes                                                               |
| (Skaalvik <i>et al.</i> , 2016)     | Yes                           | Yes                                 | Yes                                               | Yes                                                                                                                                    | 1. No discussion about saturation data 2. No details about familiar caregivers age or relation to the patient | No details                                     | Yes                                                                        | Yes                                                               |

| Studies                         | Clear statement of study aims | Qualitative methodology appropriate | Study design appropriate to address the study aim | Recruitment appropriate | Data collection                                                                                                                | Relationship between research and participants | Ethical issues considered | Data analysis                                                                                                                          |
|---------------------------------|-------------------------------|-------------------------------------|---------------------------------------------------|-------------------------|--------------------------------------------------------------------------------------------------------------------------------|------------------------------------------------|---------------------------|----------------------------------------------------------------------------------------------------------------------------------------|
| (Skaalvik <i>et al.</i> , 2016) | Yes                           | Yes                                 | Yes                                               | Yes                     | 1. No discussion about saturation data 2. No details about familiar caregivers age or relation to the patient                  | No details                                     | Yes                       | Yes                                                                                                                                    |
| (Song <i>et al.</i> , 2018)     | Yes                           | Yes                                 | Yes                                               | Yes                     | 1. No discussion about saturation data                                                                                         | No details                                     | Yes                       | Yes                                                                                                                                    |
| (Sutcliffe <i>et al.</i> 2015)  | Yes                           | Yes                                 | No discussion about the study design              | Yes                     | 1. No details about familiar caregivers relation to the patient                                                                | No details                                     | Yes                       | 1. No in-depth description about how themes were identified                                                                            |
| (Taşc <i>et al.</i> , 2012)     | Yes                           | Yes                                 | No discussion about the study design              | Yes                     | 1. No in-depth information on interview schedule 2. No discussion about saturation data 3. No details about care recipient age | No details                                     | Yes                       | 1. No in-depth description about how themes were identified 2. No discussion on contradictory data 3. No discussion on researcher bias |
| (Toot <i>et al.</i> , 2013)     | Yes                           | Yes                                 | No discussion about the study design              | Yes                     | Yes                                                                                                                            | No details                                     | Yes                       | Yes                                                                                                                                    |
| (Ven LG <i>et al.</i> 2017)     | Yes                           | Yes                                 | No discussion about the study design              | Yes                     | 1. No details about family caregivers age                                                                                      | No details                                     | Yes                       | Yes                                                                                                                                    |
| (Wang <i>et al.</i> , 2018)     | Yes                           | Yes                                 | Yes                                               | Yes                     | Yes                                                                                                                            | No details                                     | Yes                       | 1. No in-depth description about how themes were identified                                                                            |
| (Wezel, <i>et al.</i> , 2016)   | Yes                           | Yes                                 | Yes                                               | Yes                     | 1. No details about care recipient age                                                                                         | No details                                     | Yes                       | 1. No in-depth description about how themes were identified                                                                            |

Table 2. Characteristics and key findings of the included studies in this systematic review (n=81)

| Authors, publication years & countries        | Study aims                                                                                                                                                                                                                                                                              | Data collection & analysis                             | Aspects focused                                                                                       |
|-----------------------------------------------|-----------------------------------------------------------------------------------------------------------------------------------------------------------------------------------------------------------------------------------------------------------------------------------------|--------------------------------------------------------|-------------------------------------------------------------------------------------------------------|
| (Aminzadeh <i>et al.</i> , 2007), Canada      | To examine the emotional impact of disclosure of a dementia diagnosis on people with dementia both from their perspectives and those of their caregivers                                                                                                                                | Interviews following focus groups<br>Thematic analysis | Quality of life<br>Negative aspects                                                                   |
| (Berry <i>et al.</i> , 2015), United States   | To fill an important gap in research about how family members manage the risks of functional decline at home                                                                                                                                                                            | Interviews<br>Grounded theory analysis                 | Quality of life<br>Illness progression<br>Activities of daily living<br>Negative aspects              |
| (Boots LM <i>et al.</i> , 2015), Netherlands  | To gain insight into the problems, needs and wishes that caregivers of persons with dementia during the early stages of the disease; To explore if an early stage intervention for dementia caregivers would be helpful and to explore which factors influence caregivers' perspectives | Focus Group<br>Thematic analysis                       | Quality of life<br>Positive and negative aspects                                                      |
| (Boughtwood <i>et al.</i> , 2011), Australia  | To explore Arabic-speaking, Chinese-speaking, Italian-speaking and, Spanish-speaking communities caregivers' experiences and perceptions regarding caregiving and being a carer for a person with dementia                                                                              | Focus Group<br>Thematic analysis                       | Quality of life<br>Illness progression<br>Activities of daily living<br>Costs<br>Negative aspects     |
| (Bunn <i>et al.</i> , 2017), United Kingdom   | To explore the impact of dementia on access to non-dementia services and identify ways of improving service delivery for these persons with dementia                                                                                                                                    | Interviews and focus groups<br>Thematic analysis       | Illness progression<br>Costs<br>Negative aspects                                                      |
| (Butcher <i>et al.</i> , 2001), United States | To describe the essential structure of the lived experience of caring for a family member with AD and related dementia among a large and diverse sample of informal family caregivers                                                                                                   | Interviews<br>Phenomenological analysis                | Quality of life<br>Illness progression<br>Activities of daily living<br>Negative aspects              |
| (Byszewski <i>et al.</i> , 2007), Canada      | To report the findings of a descriptive, exploratory, qualitative study of patient and caregiver perspectives of the disclosure of a dementia diagnosis                                                                                                                                 | Interviews following focus groups<br>Thematic analysis | Quality of life<br>Activities of daily living<br>Negative aspects                                     |
| (Chang <i>et al.</i> , 2010), United Kingdom  | To report the lived experience and perceived service needs of caregivers of persons with dementia in Hong Kong                                                                                                                                                                          | Focus Group<br>Thematic analysis                       | Quality of life<br>Negative aspects                                                                   |
| (Connell <i>et al.</i> , 2004), United States | To examine the attitudes of caregivers and physicians toward assessing and diagnosing dementia with an emphasis on how a diagnosis is disclosed                                                                                                                                         | Interviews following focus groups<br>Thematic analysis | Quality of life<br>Negative aspects                                                                   |
| (Duxury <i>et al.</i> , 2013), United Kingdom | To explore the views of nursing staff and relatives and identify the reasons for and ways of responding to aggressive behaviour                                                                                                                                                         | Focus groups<br>Thematic analysis                      | Quality of life<br>Illness progression<br>Activities of daily living<br>Positive and negative aspects |
| (Elliott <i>et al.</i> , 2009), United States | To describe and understand the ethical thinking used in end-of-life decision-making by family surrogates on behalf of their cognitively impaired elders                                                                                                                                 | Focus group<br>Thematic analysis                       | Quality of life<br>Negative aspects                                                                   |
| (Fjellstrom <i>et al.</i> , 2010), Sweden     | To examine how people living with persons with Alzheimer's disease perceived everyday life aspects of food choices, cooking and food-related work                                                                                                                                       | Focus Group<br>Thematic analysis                       | Quality of life<br>Activities of daily living<br>Negative aspects                                     |
| (Fleming <i>et al.</i> , 2015), Australia     | To identify the environmental features that are desirable in buildings used and identify ways to improve provided care for people with dementia nearing the end of their lives                                                                                                          | Focus Group<br>Thematic analysis                       | Quality of life<br>Illness progression<br>Negative aspects                                            |

| <b>Authors, publication years &amp; countries</b>              | <b>Study aims</b>                                                                                                                                                                                                                | <b>Data collection &amp; analysis</b>            | <b>Aspects focused</b>                                                                   |
|----------------------------------------------------------------|----------------------------------------------------------------------------------------------------------------------------------------------------------------------------------------------------------------------------------|--------------------------------------------------|------------------------------------------------------------------------------------------|
| (Forbes <i>et al.</i> , 2000), United States                   | To describe families' decision-making processes, both cognitive and affective, regarding end-of-life treatments for nursing home residents with severe dementia                                                                  | Focus group<br>Thematic analysis                 | Quality of life<br>Illness progression<br>Negative aspects                               |
| (Forbes <i>et al.</i> , 2008), Canada                          | To describe experiences of family caregivers who received Canadian home and community-based services that aim to assist them in caring for their family member with dementia                                                     | Focus Group and interview<br>Thematic analysis   | Quality of life<br>Costs<br>Negative aspects                                             |
| (Frank <i>et al.</i> , 2006), United Kingdom and United States | To identify key aspects of the impact of cognitive impairment on patients with MCI and mild probable AD and their informants, and identify overlap and differences between the groups                                            | Focus group<br>Thematic analysis                 | Quality of life<br>Illness progression<br>Activities of daily living<br>Negative aspects |
| (Garcia <i>et al.</i> , 2012), Canada                          | To explore the perceptions of family and staff members on the potential contribution of environmental factors that influence disruptive behaviours and quality of life of residents with dementia living in long-term care homes | Focus Group<br>Thematic analysis                 | Quality of life<br>Negative aspects                                                      |
| (Gennip <i>et al.</i> , 2014), Netherlands                     | To examine how dementia affects personal dignity in individuals with mild to moderate dementia from their perspective                                                                                                            | Interview<br>Thematic analysis                   | Quality of life<br>Activities of daily living<br>Positive aspects                        |
| (Gessert <i>et al.</i> , 2001), United States                  | To identify areas where better communication between health professionals and patients/families might be expected to be most beneficial to families facing end-of-life decisions                                                 | Focus group<br>Phenomenological analysis         | Quality of life<br>Illness progression<br>Negative aspects                               |
| (Gessert <i>et al.</i> , 2006), United States                  | To describe and understand rural and urban differences in attitudes toward death and in end-of-life decision making                                                                                                              | Focus group<br>Thematic analysis                 | Quality of life<br>Negative aspects                                                      |
| (Givens <i>et al.</i> , 2012), United States                   | To describe the sources of stress for families of nursing home residents with advanced dementia                                                                                                                                  | Interview<br>Thematic analysis                   | Quality of life<br>Illness progression<br>Negative aspects                               |
| (Glass, 2016), United States                                   | To document and examine the context of the environment and the role of hospice in the experience of caring for persons with dementia                                                                                             | Interview<br>Phenomenological analysis           | Quality of life<br>Negative aspects                                                      |
| (Habermann, <i>et al.</i> , 2013), United States               | To explore the positive aspects experienced by adult children in providing care to their parent who either has Parkinson's or Alzheimer's disease                                                                                | Interview<br>Content analysis                    | Quality of life<br>Activities of daily living<br>Positive and negative aspects           |
| (Harmer and Orrel, 2008), United Kingdom                       | To explore the concept of meaningful activity for older people with dementia in care homes, from the perspectives of the care staff, family caregivers and residents themselves                                                  | Focus Group<br>Thematic analysis                 | Activities of daily living<br>Positive aspects                                           |
| (Harris, 2013), United States                                  | To examine the quality of the friendships that remain and continue, despite a diagnosis of some type of dementia                                                                                                                 | Interviews and focus groups<br>Thematic analysis | Quality of life<br>Positive and negative aspects                                         |
| (Hemingway <i>et al.</i> , 2016), Canada                       | To better understand the lived experience of spousal caregivers providing care to partners with AD and related dementias resident in a care facility                                                                             | Interview and Focus Group<br>Thematic analysis   | Quality of life<br>Illness progression<br>Costs<br>Negative aspects                      |
| (Huis in het Veld <i>et al.</i> , 2016), Netherlands           | To give insight into why changes in behaviour and mood are stressful for family caregivers and what self-management strategies family caregivers use when managing these changes and the stress they experience                  | Focus Group<br>Thematic analysis                 | Quality of life<br>Negative aspects                                                      |

| Authors, publication years & countries                                                                     | Study aims                                                                                                                                                                                                                                                                              | Data collection & analysis                     | Aspects focused                                                                                                |
|------------------------------------------------------------------------------------------------------------|-----------------------------------------------------------------------------------------------------------------------------------------------------------------------------------------------------------------------------------------------------------------------------------------|------------------------------------------------|----------------------------------------------------------------------------------------------------------------|
| (Innes <i>et al.</i> , 2005), United Kingdom                                                               | To develop a qualitative understanding of service use from the point of view of people with dementia and their caregivers in rural Scotland                                                                                                                                             | Interview and Focus Group<br>Thematic analysis | Quality of life<br>Costs<br>Negative aspects                                                                   |
| (Innes <i>et al.</i> , 2011), United Kingdom                                                               | To report on the views of people with dementia who live in care homes and their family caregivers on aspects of design that are important to them, discussing the relation to developing physical care environments as a respond to the wishes of people with dementia and their family | Focus Group<br>Thematic analysis               | Quality of life<br>Positive aspects                                                                            |
| (Ivey <i>et al.</i> , 2012), United States                                                                 | To examine participants' daily life experiences as informal caregivers to individuals with dementia and explore how experiences and concerns may differ by ethnicity                                                                                                                    | Focus Group<br>Thematic analysis               | Quality of life<br>Illness progression<br>Activities of daily living<br>Costs<br>Negative aspects              |
| (Jamieson <i>et al.</i> , 2016), Australia                                                                 | To investigate the experiences of people with dementia and their caregivers when transitioning home from hospital                                                                                                                                                                       | Interview and Focus Group<br>Thematic analysis | Quality of life<br>Negative aspects                                                                            |
| (Jennings <i>et al.</i> , 2017), United States                                                             | To explore the goals of people with dementia, both from the perspective of people living with early-stage disease and from the perspective of caregivers of people with all stages of dementia                                                                                          | Focus group<br>Thematic analysis               | Quality of life<br>Illness progression<br>Activities of daily living<br>Costs<br>Positive and negative aspects |
| (Juozapavicius and Weber, 2001), United States                                                             | To explore the issues faced by former Alzheimer's caregivers identifying the factors which precipitated the beginning of the caregiver role and use the reflective information to identify the stages which comprise the transition out of the caregiver role                           | Interview<br>Thematic analysis                 | Quality of life<br>Costs<br>Negative aspects                                                                   |
| (Karlin <i>et al.</i> , 2001), United States                                                               | To investigate the experience of caregiving for family members with Alzheimer's disease                                                                                                                                                                                                 | Interview<br>Thematic analysis                 | Quality of life<br>Positive aspects                                                                            |
| (Karlsson <i>et al.</i> , 2014), England, Estonia, Finland, France, Germany, Netherlands, Spain and Sweden | To investigate persons with dementia and their informal caregivers' views of inter-sectoral information, communication and collaboration throughout the trajectory of dementia care in eight European countries                                                                         | Focus Group<br>Thematic analysis               | Illness progression<br>Negative aspects                                                                        |
| (Kuneman <i>et al.</i> , 2017), Netherlands                                                                | To assess patients' and caregivers' views on and experiences with decisions about diagnostic testing for Alzheimer's disease and receiving test results                                                                                                                                 | Focus group<br>Content analysis                | Quality of life<br>Costs<br>Negative aspects                                                                   |
| (Lach and Chang, 2007), United States                                                                      | To explore caregivers' perceptions of safety problems and identify how they manage safety concerns and explore the application of health behaviour change models to the caregiver situation                                                                                             | Focus group<br>Thematic analysis               | Quality of life<br>Activities of daily living<br>Negative aspects                                              |
| (Lamahewa <i>et al.</i> , 2017), United Kingdom                                                            | To explore difficulties in decision making for practitioners and family caregivers at the end of life for people with dementia                                                                                                                                                          | Focus Group and interview<br>Thematic analysis | Quality of life<br>Negative aspects                                                                            |
| (Lamech <i>et al.</i> , 2017), India                                                                       | To explore the needs of family caregivers of persons with dementia in India                                                                                                                                                                                                             | Focus Group and interview<br>Thematic analysis | Quality of life<br>Activities of daily living<br>Costs<br>Negative aspects                                     |
| (Lampléy-Dallas <i>et al.</i> , 2001), United States                                                       | To assess the perceived needs of African-American caregivers and their expectations of the health care system, perceived level of success and satisfaction in meeting their needs and their level of distress                                                                           | Focus group<br>Thematic analysis               | Quality of life<br>Costs<br>Positive and negative aspects                                                      |

| Authors, publication years & countries            | Study aims                                                                                                                                                                                                                                                                                | Data collection & analysis                      | Aspects focused                                                                                   |
|---------------------------------------------------|-------------------------------------------------------------------------------------------------------------------------------------------------------------------------------------------------------------------------------------------------------------------------------------------|-------------------------------------------------|---------------------------------------------------------------------------------------------------|
| (Lethin <i>et al.</i> , 2016), Sweden             | To investigate caregivers' experiences of formal care when caring for a person with dementia through the process of the disease                                                                                                                                                           | Focus Group<br>Content analysis                 | Quality of life<br>Illness progression<br>Activities of daily living<br>Negative aspects          |
| (Levkoff and Hinton, 1999), United States         | To show how family caregivers draw on their cultural/personal resources to create stories about the nature and meaning of illness and to ask how ethnic identity may influence the kinds of stories family caregivers tell                                                                | Interview<br>Thematic analysis                  | Quality of life<br>Illness progression<br>Negative aspects                                        |
| (Lian <i>et al.</i> , 2017), China                | To understand the experiences of people with dementia and their caregivers in engaging in dementia diagnosis                                                                                                                                                                              | Focus Group and interview<br>Thematic analysis  | Quality of life<br>Activities of daily living<br>Costs<br>Negative aspects                        |
| (Livingston <i>et al.</i> , 2010), United Kingdom | To identify common difficult decisions made by family caregivers on behalf of people with dementia and facilitators of and barriers to such decisions in order to produce information about overcoming barriers                                                                           | Focus Group and interview<br>Thematic analysis  | Quality of life<br>Illness progression<br>Activities of daily living<br>Negative aspects          |
| (Madsen and Birkelund, 2013), Denmark             | To examine the experiences family caregivers of persons with dementia highlighting these similarities or differences                                                                                                                                                                      | Focus group<br>Phenomenological analysis        | Quality of life<br>Negative aspects                                                               |
| (Manthorpe <i>et al.</i> , 2013), United Kingdom  | To increase understanding of the experiences of people developing dementia and of their caregivers and to inform practice and decision making                                                                                                                                             | Interview<br>Thematic analysis                  | Quality of life<br>Negative aspects                                                               |
| (McCabe <i>et al.</i> , 2017), United Kingdom     | To understand the strategies for everyday life with dementia by scaffolding and working together in community and formal support                                                                                                                                                          | Focus group and interviews<br>Thematic analysis | Quality of life<br>Illness progression<br>Activities of daily living<br>Costs<br>Negative aspects |
| (Meyer, 2015), United States                      | To describe the beliefs and experiences of Vietnamese caregivers caring for a family member with dementia and to elicit their ideas about promising interventions                                                                                                                         | Interview<br>Thematic analysis                  | Quality of life<br>Negative aspects                                                               |
| (Middlemass <i>et al.</i> 2018), United Kingdom   | To explore the experiences/perceptions of informal caregivers of people with dementia when interacting with the health care system and to investigate healthcare professionals' views and current practice regarding people with dementia and their interactions with informal caregivers | Focus Group and interview<br>Thematic analysis  | Quality of life<br>Illness progression<br>Costs<br>Negative aspects                               |
| (Milte <i>et al.</i> , 2016), Australia           | To describe the meaning of quality residential care from the perspective of people with cognitive impairment and their family members                                                                                                                                                     | Focus Group and interview<br>Thematic analysis  | Costs<br>Positive and negative aspects                                                            |
| (Moreno-Cámara <i>et al.</i> , 2016), Spain       | Identify and analyse the problems that arise in the adaptation process of the caregiver to changes during family care to a person affected by dementia                                                                                                                                    | Focus group<br>Grounded Theory                  | Quality of life<br>Illness progression<br>Costs<br>Negative aspects                               |
| (Morgan <i>et al.</i> , 2002), Canada             | To obtain input from decision-makers and others to develop the objectives and design for a study of rural dementia care to fight the low use of formal supportive services such as home care and support groups by family caregivers                                                      | Focus Group<br>Thematic analysis                | Quality of life<br>Costs<br>Negative aspects                                                      |
| (Moyle <i>et al.</i> , 2002), Australia           | To investigate family caregivers' perceptions of having a relative in a dementia care unit                                                                                                                                                                                                | Focus group<br>Content analysis                 | Quality of life<br>Illness progression<br>Positive and negative aspects                           |

| Authors, publication years & countries          | Study aims                                                                                                                                                                                       | Data collection & analysis                                                        | Aspects focused                                                                          |
|-------------------------------------------------|--------------------------------------------------------------------------------------------------------------------------------------------------------------------------------------------------|-----------------------------------------------------------------------------------|------------------------------------------------------------------------------------------|
| (Oliveira <i>et al.</i> , 2017), United Kingdom | To explore how persons with dementia make sense of their own quality of life and to identify the factors that enhance or compromise their quality of life                                        | Focus group<br>Phenomenological analysis                                          | Quality of life<br>Activities of daily living<br>Costs<br>Positive and negative aspects  |
| (Paton <i>et al.</i> , 2004), United Kingdom    | To gain insight into caregivers' understanding of the causes of behaviours they find problematic in people with Alzheimer's disease in order to inform the development of educational strategies | Interview<br>Thematic analysis                                                    | Illness progression<br>Negative aspects                                                  |
| (Peel and Harding, 2013), United Kingdom        | To explore the issue of accessing health and social care support services from caregivers' own perspectives                                                                                      | Focus group, interview and questionnaires (online and paper)<br>Thematic analysis | Quality of life<br>Costs<br>Negative aspects                                             |
| (Phillipson and Jones, 2011), Australia         | To explore the utility of behavioural theories to identify the beliefs that contribute to service non-use and to determine whether the beliefs of service users and non-users differ             | Focus Group and interview<br>Content analysis                                     | Quality of life<br>Negative aspects                                                      |
| (Polenick <i>et al.</i> , 2018), United States  | To examine causal attributions about BPSD among individuals caring for a family member with dementia                                                                                             | Focus Group<br>Thematic analysis                                                  | Quality of life<br>Activities of daily living<br>Costs<br>Negative aspects               |
| (Polenick <i>et al.</i> , 2018), United States  | To examine family caregivers' strategies for managing behaviour and psychological symptoms of dementia                                                                                           | Focus Group<br>Thematic analysis                                                  | Quality of life<br>Positive and negative aspects                                         |
| (Poole <i>et al.</i> , 2018), United Kingdom    | To investigate the views of people with dementia and the views of their family caregivers on important factors regarding care at end of life                                                     | Focus Group and interview<br>Thematic analysis                                    | Quality of life<br>Illness progression<br>Positive aspects                               |
| (Popham and Orrell, 2012), United Kingdom       | To determine to what extent the care home environment met the requirements of residents with dementia in the context of the views of managers, family caregivers and staff                       | Focus Group and interview<br>Thematic analysis                                    | Quality of life<br>Illness progression<br>Positive and negative aspects                  |
| (Prorok <i>et al.</i> , 2016), Canada           | To examine the perceived primary care health care experiences of both persons with dementia and their caregivers                                                                                 | Focus Group<br>Thematic analysis                                                  | Quality of life<br>Costs<br>Negative aspects                                             |
| (Qazi <i>et al.</i> , 2010), United Kingdom     | To identify symptoms, risk factors and intervention strategies for anxiety of people with dementia, family caregivers and care staff                                                             | Focus Group<br>Mind-map technique                                                 | Quality of life<br>Illness progression<br>Activities of daily living<br>Negative aspects |
| (Quinn <i>et al.</i> , 2014), United Kingdom    | To explore how family members and care staff understand awareness in people with severe dementia and what this awareness means to them                                                           | Focus Group<br>Thematic analysis                                                  | Quality of life<br>Negative aspects                                                      |
| (Robinson <i>et al.</i> , 2008), Australia      | To reveal views about dementia diagnosis derived from a larger study of information needs of caregivers of people with dementia in Australia                                                     | Focus Group<br>Thematic analysis                                                  | Quality of life<br>Negative aspects                                                      |
| (Sarabia-Cobo <i>et al.</i> , 2016), Spain      | To describe the processes of decision-making used by families regarding treatments at the end of life of institutionalized patients with advanced stages of dementia                             | Focus Group<br>Thematic analysis                                                  | Quality of life<br>Negative aspects                                                      |
| (Scott <i>et al.</i> , 2016), United Kingdom    | To develop an understanding of challenging behaviour and how it impacted on the lives of family caregivers                                                                                       | Focus group<br>Content analysis                                                   | Quality of life<br>Negative aspects                                                      |

| Authors, publication years & countries           | Study aims                                                                                                                                                                                                                                                                                                               | Data collection & analysis                                 | Aspects focused                                                                                       |
|--------------------------------------------------|--------------------------------------------------------------------------------------------------------------------------------------------------------------------------------------------------------------------------------------------------------------------------------------------------------------------------|------------------------------------------------------------|-------------------------------------------------------------------------------------------------------|
| (Skaalvik <i>et al.</i> , 2016), Norway          | To describe how people with AD express their sense of self in accordance with the theory of selfhood described by Harré (1998)                                                                                                                                                                                           | Interview<br>Phenomenological and thematic analysis        | Quality of life<br>Activities of daily living<br>Negative aspects                                     |
| (Song <i>et al.</i> , 2018), Korea               | To identify family caregivers' experiences in managing the BPSD with particular focus on their interpersonal interactions with patient with dementia                                                                                                                                                                     | Focus group<br>Content analysis                            | Quality of life<br>Activities of daily living<br>Negative aspects                                     |
| (Sutcliffe <i>et al.</i> 2015), United Kingdom   | To present the views of people with dementia and caregivers on a range of topics including their positive and negative experiences of dementia care; access to information and its communication; and suggestions to improve dementia care                                                                               | Focus Group<br>Thematic analysis                           | Quality of life<br>Illness progression<br>Costs<br>Negative aspects                                   |
| (Taş <i>et al.</i> , 2012), Turkey               | To examine the physical and psychological demands experienced by caregivers of patients with AD in light of the lack of home care support in Turkey                                                                                                                                                                      | Focus Group<br>Thematic analysis                           | Quality of life<br>Activities of daily living<br>Negative aspects                                     |
| (Toot <i>et al.</i> , 2013), United Kingdom      | To identify which factors may lead to crisis for people with dementia and their caregivers and identify interventions these individuals believe could help in crisis                                                                                                                                                     | Focus Group<br>Thematic analysis                           | Quality of life<br>Negative aspects                                                                   |
| (Ven LG <i>et al.</i> 2017), Netherlands         | To explore how people with dementia, their informal caregivers and their professionals participate in decision making about day-care and to develop a typology of participation trajectories                                                                                                                             | Interview<br>Content analysis                              | Quality of life<br>Illness progression<br>Activities of daily living<br>Positive and negative aspects |
| (Wang <i>et al.</i> , 2018), China               | To develop a theoretical model explaining the longitudinal changes in the caregiving process for family caregivers of persons with mild cognitive impairment in Taiwan                                                                                                                                                   | Interview<br>Content analysis                              | Quality of life<br>Illness progression<br>Activities of daily living<br>Costs<br>Negative aspects     |
| (Wezel, <i>et al.</i> , 2016), Netherlands       | To describe the perspectives of female Turkish, Moroccan and Surinamese Creole family caregivers in the Netherlands about providing family care to a close relative with dementia                                                                                                                                        | Focus Group and interview<br>Content analysis              | Quality of life<br>Illness progression<br>Positive and negative aspects                               |
| (Wijngaarden <i>et al.</i> , 2018), Netherlands  | To develop an in-depth understanding of what it means to live with dementia and to gain insight into what constitutes the art of living with dementia, both from the perspective of family caregivers                                                                                                                    | Focus Group and interview<br>Thematic analysis             | Quality of life<br>Illness progression<br>Activities of daily living<br>Negative aspects              |
| (Wolfs <i>et al.</i> , 2012), Netherlands        | To gain caregivers' insights into the decision-making process in dementia patients with regard to treatment and care                                                                                                                                                                                                     | Focus groups and Interviews<br>Grounded Theory Analysis    | Quality of life<br>Illness progression<br>Negative aspects                                            |
| (Xiao <i>et al.</i> , 2013), Australia           | To explore the experiences of family caregivers from Chinese, Greek, Italian and Vietnamese groups in utilising dementia service                                                                                                                                                                                         | Interview and focus groups<br>Thematic analysis            | Quality of life<br>Illness progression<br>Activities of daily living<br>Negative aspects              |
| (Xiao <i>et al.</i> , 2014), Australia and China | To compare socially and culturally constructed enablers and barriers pertinent to dementia caregivers in one capital city in Australia and one capital city in China through critical reflection on the caregivers' subjective and objective experiences for the improvement of dementia care services in both countries | Focus Group and interview<br>Giddens' Structuration Theory | Quality of life<br>Activities of daily living<br>Negative aspects                                     |



| <b>Authors, publication years &amp; countries</b> | <b>Study aims</b>                                                                                                                     | <b>Data collection &amp; analysis</b>          | <b>Aspects focused</b>                                                                            |
|---------------------------------------------------|---------------------------------------------------------------------------------------------------------------------------------------|------------------------------------------------|---------------------------------------------------------------------------------------------------|
| (Xiao <i>et al.</i> , 2015), Australia            | To explore the perceived challenges of dementia care from Vietnamese family caregivers and Vietnamese care workers in South Australia | Focus Group and interview<br>Thematic analysis | Quality of life<br>Illness progression<br>Activities of daily living<br>Costs<br>Negative aspects |
| (Zabalegui <i>et al.</i> , 2008), Spain           | To better understand informal caregivers' views about the resources that are available to them or should be available to them         | Focus group<br>Content analysis                | Quality of life<br>Costs<br>Negative aspects                                                      |

MCI: Mild Cognitive Impairment; AD: Alzheimer's Disease; BPSD: Behaviour and psychological symptoms of dementia

*Table 3. Summary of methods and participants of 81 studies included in this systematic review*

---

|                       | <b>People with<br/>AD/Dementia</b> | <b>Family<br/>Caregivers</b> | <b>Former<br/>Caregivers</b> | <b>Dyads</b> | <b>Number<br/>of studies</b> |
|-----------------------|------------------------------------|------------------------------|------------------------------|--------------|------------------------------|
| Focus group           | 10                                 | 41                           | 1                            | 0            | 52                           |
| Qualitative interview | 4                                  | 15                           | 1                            | 0            | 20                           |
| Questionnaire         | 0                                  | 1                            | 0                            | 0            | 1                            |
| Mixed methods         | 9                                  | 24                           | 2                            | 2            | 37                           |
| Number of studies     | 23                                 | 81                           | 4                            | 2            | 108                          |

---

**Additional file 1 | Search strategy**

Proposed Medline Search Terms\*

**Controlled vocabulary and text/key words**

“Alzheimer Disease” [MeSH Major Topic] OR “Mild cognitive impairment” OR “Cognitive Dysfunction” [MeSH Major Topic] Dementia [Title/Abstract]

**Method**

"Interviews as Topic" [MeSH] OR Interview\* [Title/Abstract]  
"Surveys and Questionnaires" [MeSH] OR Survey\* OR Questionnaire\* [Title/Abstract]  
"Focus Groups" [MeSH]  
"Geriatric Assessment" [MeSH] OR "Health Impact Assessment" [MeSH]

**Population Terms**

"Caregivers" [MeSH]  
Caregiver\* OR Carer [Title/Abstract]  
"Family" [MeSH]  
Famil\* [Title/Abstract]  
"Patient Care" [MeSH]

**Outcome**

"Illness Behavior" [MeSH]  
"Cost of Illness" [MeSH]  
"Activities of Daily Living" [MeSH]  
"Quality of Life" [MeSH]  
"Self Concept" [MeSH]  
"Stress, Psychological" [MeSH]  
"Sick Role" [MeSH]  
"Outcome Assessment Health Care" [MeSH]  
"Health Expenditures" [MeSH]  
"Health Care Costs" [MeSH]  
Self-Perception [Title/Abstract]

**Studies Terms**

“cohort studies” [MeSH]  
“longitudinal studies” [MeSH]  
“follow-up studies” [MeSH]  
“prospective studies” [MeSH]  
“retrospective studies” [MeSH]  
Cohort OR Longitudinal OR Prospective OR Retrospective [all fields]

**Filters activated**

Publication date from 01.01.1998 to 15.07.20 (present)

\*Search terms and strategy will be adapted to database: Embase, PsycInfo, Web of Science and Scopus

## Additional file 2 | PRISMA Checklist

| Section/topic             | #  | Checklist item                                                                                                                                                                                                                                                                                              | Reported on page #            |
|---------------------------|----|-------------------------------------------------------------------------------------------------------------------------------------------------------------------------------------------------------------------------------------------------------------------------------------------------------------|-------------------------------|
| <b>TITLE</b>              |    |                                                                                                                                                                                                                                                                                                             |                               |
| Title                     | 1  | Identify the report as a systematic review, meta-analysis, or both.                                                                                                                                                                                                                                         | 1                             |
| <b>ABSTRACT</b>           |    |                                                                                                                                                                                                                                                                                                             |                               |
| Structured summary        | 2  | Provide a structured summary including, as applicable: background; objectives; data sources; study eligibility criteria, participants, and interventions; study appraisal and synthesis methods; results; limitations; conclusions and implications of key findings; systematic review registration number. | 2                             |
| <b>INTRODUCTION</b>       |    |                                                                                                                                                                                                                                                                                                             |                               |
| Rationale                 | 3  | Describe the rationale for the review in the context of what is already known.                                                                                                                                                                                                                              | 3                             |
| Objectives                | 4  | Provide an explicit statement of questions being addressed with reference to participants, interventions, comparisons, outcomes, and study design (PICOS).                                                                                                                                                  | 4-6                           |
| <b>METHODS</b>            |    |                                                                                                                                                                                                                                                                                                             |                               |
| Protocol and registration | 5  | Indicate if a review protocol exists, if and where it can be accessed (e.g., Web address), and, if available, provide registration information including registration number.                                                                                                                               | Available from author         |
| Eligibility criteria      | 6  | Specify study characteristics (e.g., PICOS, length of follow-up) and report characteristics (e.g., years considered, language, publication status) used as criteria for eligibility, giving rationale.                                                                                                      | 4-6                           |
| Information sources       | 7  | Describe all information sources (e.g., databases with dates of coverage, contact with study authors to identify additional studies) in the search and date last searched.                                                                                                                                  | 4-6                           |
| Search                    | 8  | Present full electronic search strategy for at least one database, including any limits used, such that it could be repeated.                                                                                                                                                                               | Figure 1<br>Additional file 1 |
| Study selection           | 9  | State the process for selecting studies (i.e., screening, eligibility, included in systematic review, and, if applicable, included in the meta-analysis).                                                                                                                                                   | Figure 1<br>Additional file 1 |
| Data collection process   | 10 | Describe method of data extraction from reports (e.g., piloted forms, independently, in duplicate) and any processes for obtaining and confirming data from investigators.                                                                                                                                  | 4-6                           |
| Data items                | 11 | List and define all variables for which data were sought (e.g., PICOS, funding sources) and any assumptions and simplifications made.                                                                                                                                                                       | 4-6                           |

**Additional file 2 | PRISMA Checklist**

|                                    |    |                                                                                                                                                                                                                        |     |
|------------------------------------|----|------------------------------------------------------------------------------------------------------------------------------------------------------------------------------------------------------------------------|-----|
| Risk of bias in individual studies | 12 | Describe methods used for assessing risk of bias of individual studies (including specification of whether this was done at the study or outcome level), and how this information is to be used in any data synthesis. | 4-6 |
| Summary measures                   | 13 | State the principal summary measures (e.g., risk ratio, difference in means).                                                                                                                                          | NA  |
| Synthesis of results               | 14 | Describe the methods of handling data and combining results of studies, if done, including measures of consistency (e.g., I <sup>2</sup> ) for each meta-analysis.                                                     | 6   |
